# Supplementary material for: Воинское обучение и воспитание в российской армии: поиск новой парадигмы
Source: Royal Society of Chemistry journal article supplement (doi:10.1039/c8tb02917b), 2012-01-01
Supplement: c8tb02917b1.pdf [file c8tb02917b1.pdf]

## **Supporting Information**

Silver nanoparticles with pH induced surface charge switchable  
properties for antibacterial and antibiofilm applications

Zhuangzhuang Qiao, Yan Yao, Shaomin Song, Meihui Yin and Jianbin Luo\*

College of Chemistry and Environmental Protection Engineering, Southwest Minzu

University, Chengdu 610041, China

Tel: +86 28 85522269

\*E-mail addresses: [luojb1971@163.com](mailto:luojb1971@163.com)

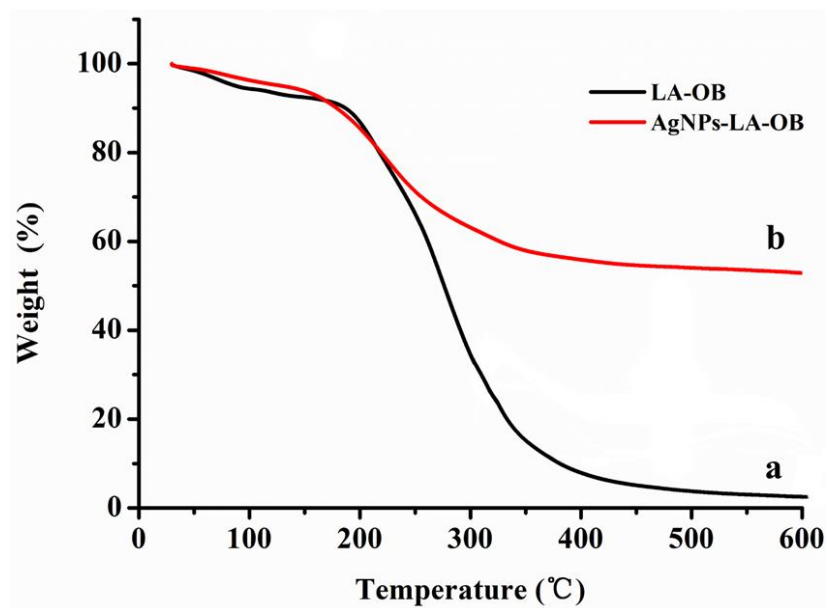

Figure S1. TGA curves of LA-OB (a) and AgNPs-LA-OB (b)

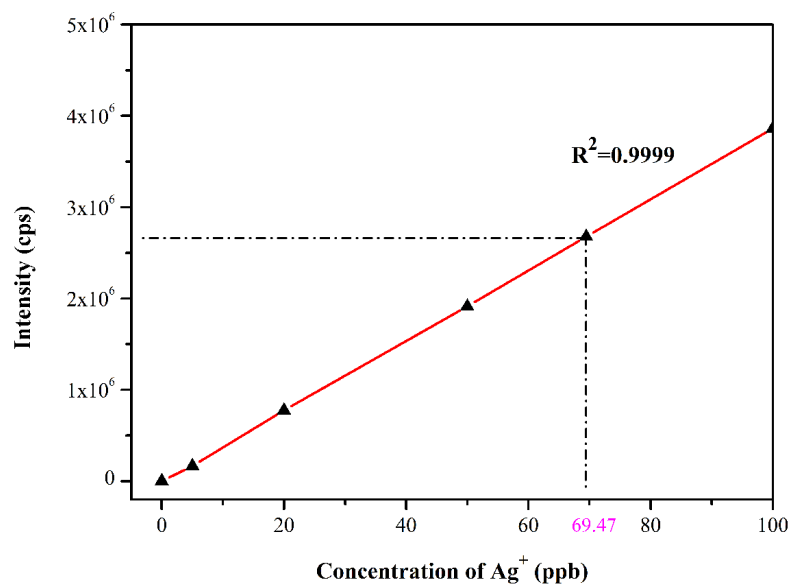

Figure S2. Silver ions standard curve measure by ICP-MS
